# Supplementary material for: Elevated Winter Stream Temperatures below Wastewater Treatment Plants Shift Reproductive Development of Female Johnny Darter Etheostoma nigrum: A Field and Histologic Approach
Source: MDPI journal article supplement (doi:10.3390/fishes7060361), 2022-11-29
Supplement: s1 [file s1]

## Supplemental Materials

### Estrogenicity Analysis Methods and E2-EQ Results Table

*Isolating and Sequencing of partial Johnny Darter Vtg3 cDNA*

Dissected fish livers were preserved on dry ice and sent to the GLTED laboratory for vitellogenin mRNA (Vtg) analysis. Based on a search of NCBI [64] and UniProt [65] a vitellogenin protein or mRNA sequence was not available for Johnny Darters. Consequently, multiple sets of PCR primers were designed using a vitellogenin 3 (Vtg3) gene sequence available for a closely related species, the Orangethroat Darter *Etheostoma spectabile* [66]. Primers were developed based on mRNA sequence XM\_032526230.1, with exon boundaries identified. Primers were designed using the Integrated DNA Technologies RealTime PCR tool with the maximum amplicon size set to 500 bp, minimum to 250 bp, and optimum at 450 bp. Forward and reverse primers from different sets were then selected to produce primer pairs with an amplicon length of approximately 1000 pb. A total of five primer pairs, spanning exon boundaries were designed (Table S1; List S1).

**Table S1.** Primers designed for Orangethroat Darters, Vtg3.

| Primer ID               | Start position | Tm (°C) | Amplicon Length | Sequence 5'→3'         |
|-------------------------|----------------|---------|-----------------|------------------------|
| Fp1116_otd_vtg_15-9_fw1 | 20             | 61.7    | 1160            | GCTGCCTCGTTGGTCTAG     |
| Fp1117_otd_vtg_15-9_rv1 | 1179           | 61.7    | 1160            | ATTAGGAGTCACATCACCAGC  |
| Fp1118_otd_vtg_9-3_fw1  | 693            | 61.7    | 966             | TCTCATTACGAAGGCTCATGG  |
| Fp1119_otd_vtg_9-3_rv1  | 1658           | 62      | 966             | ATCATGCGAATCTCAGTGGG   |
| Fp1120_otd_vtg_7-10_fw1 | 1304           | 61.9    | 1072            | TGGTGCTTTTCGTATGGCTC   |
| Fp1121_otd_vtg_7-10_rv1 | 2375           | 62      | 1072            | TGGAAGTAGCGAACCTCAAAG  |
| Fp1122_otd_vtg_10-1_fw1 | 2103           | 62      | 1122            | TCTTAGCGCCAGTGACTTTC   |
| Fp1123_otd_vtg_10-1_rv1 | 3224           | 62.2    | 1122            | TCATAAAGGTCGCTGTGATGG  |
| Fp1124_otd_vtg_1-17_fw1 | 2933           | 61.6    | 1064            | GTGTGGAGTCTGAGTTAAGGAG |
| Fp1125_otd_vtg_1-17_rv1 | 3996           | 62.1    | 1064            | GTGAGATTTTGTTGCAGCG    |

**List S1.** XM\_032526230.1 Orangethroat Darter vitellogenin 3 sequence with primer pairs

- “nnnnn” indicates intron

- otd\_vtg\_15-9
- otd\_vtg\_9-3
- otd\_vtg\_7-10
- otd\_vtg\_10-1
- otd\_vtg\_1-17

ATGCGAGGGCTCCTCCTATGCTGCCTCGTTGGTCTAGCCAnnnnn

CGAGTCAAAGTGTCAAGTTATGnnnnn

AGCCCCACCTGATGCCGAATAAACCTATGAGTATAAATATGAGGGAGAGGTCAATTTTGGACT  
CGGCAT

GCTAAACCTTGCTGAGTCTGGTGCAAGAATCACGTGCAAGATCAAGATCAGTGGGGTGTCTGGCG  
CAAACA

TTCATCCTTCAGnnnnn

GTTTCAGATTTGGCCTTCAAGGAGTTCAATGGCTTCCAGGGGAAAGACAGCTTTATTGCCTCCCC  
AAAGC

TCACCCAGCGTATTGCTTCCCAGCTTGTCAAACCTTTCATGTTTGACTACACTGGTGGACACGTTG  
GTAA

CATCCGAGCCTCTGCTGAGATTTCTGACACTATTGTCAACATTGTGAGAGGGATTCTGGGATTGTT  
CCAA

GTCACTGTGAAGACCACACAGACGATCTATGAGCTTGAAGAGnnnnn

GCTGGCATCCATGGCATTGTCCGAGTAACTATGCTACTGAAGTAAACATGGAGACAAAGGACA  
TGACCA

TCACTCAGGTTGTGGATATTGGTAACTGCAGGGAGAAAGTAGCCATGTACAAGGAATGGCTAC  
CGCTGT

GTTTGACAAAGTCTCCAAACAGnnnnn

AGGGGTGAATCTGTCATTTC AACAGTGAGATATATTTACACAGTCAAGCCAACAGCAGAGGGAG  
GTCTCA

TTACGAAGGCTCATGGCCTGGAGCAACAGCACTTCAGTCCCTTCAACGTGAAGGGCGGCAGTTTC  
CAGAT

GCTAGCGATnnnnn

GAAGGAAATGGTGCTGCTCGGAGTGAGTGACACACCGAGAGCCGTCGTGTCTGAGCCAATGGAA  
AGCAAG

GGCAACCTTGTTTACCATTTTGTCAATGCAGATGCTAATTTACCTATTTTGATGCAGAGACTGGAC  
AACC

CAGTACCAAAGnnnnn

GCTATTGAGTTGATCAAGCGTCTGGCAGAGGTTAATCGTTACAAGATTGACAGTGCAACAACAG  
AGGACA

CGATAAAGCTGTATCAACTCCTACGAGCAATTCCCTATGAAAAATTAGAAGTTATGTGGAAGCA  
ATTTGC

AGCAAATGATGAGCAAAGnnnnn

ACGTTGGTTTTTGGACATGATTGTTGAGGTAAACGATGCCAGAATCCTGAAGTTCTTCCAAATGA  
GGTC

CAGGCTGGTGATGTGACTCCTAATGAAGGTCTGCAAGCCATTTTGCTGGTGATGAACCATCTCCA  
GCCTA

TTCCTGATCTGGTTGAGATGGCTAAAnnnnn

ATGTTTTTAAGCATGCCCTTTTGTAATCCAATATCTATCTTTGGCATGCTGTGGTGCTTTCGTATG  
GCT

CTCTGGTGTACAAGCACTGCACCTATTATACACCTTGTCTGTAGCTGTTGTTCAAnnnnn

CCACTACTGAACATGGCTGTGGAAAGTCACAGGAATGGCTCCACGGCAGACATGGTCATCGCAC  
TGAAAG

CTCTGGGGAATGCAGGTCATCCAGGCAGCATTAAAACCATCATGCGCTTCCTCCCCGGAGTTGGT  
GCCAG

CCCTGTGAATCTGCCACCTCGTGTGCTGAGTGCCGCTGTGCAGTCTATGAGACTTATAGCTGCCAG  
AGAC

CCTCACAGTnnnnn

GTCCAAGACATCACCATGAGTCTGTTCTGCAAAAGAACCTTCCCACTGAGATTCGCATGATGGC  
CTTCA

TGATATTGTTTGACACTCAGCCATCAATGGCTCTGATTTCCACAGTGACTGTACATCTACAGGAA  
GAAAA

AGACCTCCATGTTGTTAGCTTTGCATACTCCTACTTTAAAAGTGTCGCCAGATCCAGAACTCCAA  
ACAAC

CACTTCCTnnnnn

CTCAACTGCCTGCAACGTTGCCATAAAAATCCTGGCCCCTAAATTTGGCCGTCTCAGCTATCATTACAGC

AAAGCAACACGCATGGACTGGTTTAATGnnnnn

ATGATTACCTAATTGGTACAGCAGCAGAAGTCTTCATGCTGCGAAATGCAACAAACATCTTTCCC  
ACTGA

AATCATGATGAAAGGAAAATTTTATTTCAATTGGAAGCATTCTGCAGCTATTGGAGnnnnn

TTGGGTATCCATGCTGAGGGGCTTAAGGAACTGCTTGGCGCTGGCATCCCTAGTTTTAAAGGAGATCTTA

GCGCCAGTGACTTTCAGGCTGTTCTCAATGTGnnnnn

CTTAAAACTGGGAAGTTCTGCCCAATGATAAGCCTGTCCTCTCTGCCTATACACGGGCCTTTGG  
ACAAG

AGTGGTTCTTTGCTGATATTACCAAAGACACCATTCGGAACATGTTTCAGGnnnnn

GCTTTCAGCCCTACAGGGAAAGAGAGCCCTCTGTGGTCTGCGATTGGGAATTTACAGAAGGGAG  
TGTCAT

GGCATTGGACAAAGCCTTACTTGATCTTTGAGGTTGCTACTTCCAAGCTACTACCCTAGGCCTCC  
CACT

GGAGATAAGCAAATATTATCAATCCATCAATGGGATCACTGTAAATGnnnnn

CCAAGGCTGCAGTAAATCCAACACTGACTGATCGTCTTGGACAACCTGCTGACTTCTGACATTTCA  
CTGGA

GACTGATGGTTTTATTGGnnnnn

TTACACTAAGGATTTTTGGGTTTTCTATGGGATCAACACAGAGCTTTTCCAGTGTGGTTCTGAGTTT  
AAG

AGCAAAACACCTATTTCCATCCCTTGGAATTTTGCTGCCAAGATCAATGTCGGAGAGAGGAAGTT  
TGAAC

TCGACTTCCCTCCATGCAAAAAAGAGTTTGAACTTTTTTCAGTCAGnnnnn

CTCCAATGTGTACGCAGTCTCCAGGAACCTTGAAGAACCAGCTTTGACCAAAATGACTCCAATTA  
TGGCC

ACCACTACTGACTCCAATGATGAAGCTGTCCGCAAGGGGCCAACAGCTGCGGGGCCTGAGTCAG  
ATCAGnnnnn

ATACTGACACCAAACGTCTGGCATCCAAGATCCAAGATGTGTGCTGAGAGTAAGATTTATGGAG  
CTGGTC

TGTCTGTGGAGTCTGAGTTAAGGAGAGAGTATTATCATGAGGAATACCCCCTTTACTATTTCCTGG  
GATA

TACCAACATGGCATTGAAAGTAGTCCCAGnnnnn

TTCAGGCAATCAAAGCTGTTGACAAAATCCACTTTGAGGTTAATGCCGGCCCGAGCAAACATCC  
AGTCAG

CACACTGCAACTGCTAAAGACTCTGAGGAGGCTTTCCAAGnnnnn

GAAGCCACCCAGGGAGTACGTCTGTCCTCTGATTCAGCCTCAAGCGACAGCGGATCTCATCACA  
GCCATC

ACAGCGACCTTTATGAAnnnnn

AGCTTGAACCTAACACCTGAAGCTATGTTGAATATTAAAGCCTTGGCCATGAGTGGCAACCAGA  
AGCCAG

AGGGTTACGATGCAGCCTTCTTCCACACAGCCGAGGCAAACATTCAGAATGCCCAGATGATTGT  
GTCCCA

GGTCGGGGAAGACACCAATTGGAAGATGTGCGTTGACACCAATGTGAATGCCCATGTTGAGGCA  
AAGnnnnn

GCACACATTGGATGGGGAGCTGAATGTCAGTCCTATGAAATGTCAGTGGAATCTGCAACTGCCC  
ATCAGC

CTGGCTCCAAGCCAACACTCAAGGTCACAGTACACTGGACCAAGATACCAGGGACCATCGCAG  
AGTTGGG

CACAAGnnnnn

AATTGAAAGCTACATTCCAGGCGTGGCTTTTTTTCTTGGCTTCTACGAGACACATGAGAGAAATG  
CCAAG

CAGGAGATTTCTGCAACAGTAGCTGCCGCCTCAGCAGACAGTGTGCGATGTGAAGATTAAATTCCC  
AGAGnnnnn

CTTACAGTCTACCGCCAGGCTTTTCCAGTTTCACTGCTGACTGGCAGTTTTTCAGGAGTTTCAACAC  
TACA

GAAACACAACAATCGGCAGCTTTGGACGCGCATAAAAACATnnnnn

TGGATTGTGTTGACTGATTTCCATGCAAAACAGATGAGCAAAAACAAGCAAAGAGCTGTGCCAG  
TTTTGC

TTGCTTTTTTAAATATGTTTTGTGTTGAAAGACAACAAAGCCCAGATGGGATCCAGATGTGGCTTT  
TCAC

AGTGATAA **TGCTGCAACCAAAATCTCAC** CACTGTGATGAAAGTGAGGATCATAAAAGTTGCATC  
AGTAAT

CCATCAAATGTCACCCTTTTGAAAATAACCTGTAAAGGTCCAGAATTATTCATCATAAAGTGTGT  
TAATA

TTTGAACACATCTTTTGATGAAATATTGTGTAAAGTCATGCTTTTGTCCCAAAATATTGTATCATC  
ATAA

TGCATGCATTCATCAAAATATGTTTCAACAATCTGTGTTTTTGCTCCAAACCTGTTAATATAAATC  
CTTT

GCTAATCCAAA

Total RNA was extracted from Johnny Darter liver samples (n=12 females; n=77 males) using Qiagen RNEasy Mini RNA purification kits (Qiagen 74106). RNA quality and quantity was evaluated using a Nanodrop ND-1000 spectrophotometer (Nanodrop Technologies, Wilmington, DE, USA). Complementary DNA was prepared from n=8 female and n=2 male Johnny Darter liver RNA samples using a High-Capacity cDNA reverse transcription kit (Applied Biosystems 4368812). Complementary DNA from six females was pooled for use in an initial set of PCR reactions. Touchdown PCR was conducted using pooled female liver Johnny Darter cDNA as a template and the five Orangethroat Darter primer pairs (Table S1) with Jumpstart Taq Polymerase (Sigma D9307). PCR products were visualized on a 3% agarose gel and amplicon sizes were verified against a 100 bp DNA ladder (Sigma D3687). Bands of the expected approximate amplicon size were obtained for all five primer sets. Bands were excised and DNA was extracted from the bands using a Nucleotrap kit (Machery-Nagel, Düren, Germany; Ref 750584). Extracted Johnny Darter PCR products were then sent to the University of Minnesota for Sanger Sequencing. Many of the partial sequences received did not have sufficient data to use. However, sequences from segments produced by the first two primer pairs (otd\_Vtg\_15-9 and otd\_Vtg\_9-3; List S1) contained acceptable base pair data. These sequences were aligned and assembled based on overlap into a contiguous 1108 bp segment. This segment then had 30 bp trimmed off each end to produce a final 1048 portion of the putative Johnny Darter vitellogenin 3 sequences (List S2). A BLASTx search was performed using the partial Johnny Darter Vtg3 sequence to confirm orthology with Vtg3 of other related fish species (List S2). Johnny Darter specific primers (Table S2) were designed using the partial Johnny Darter Vtg3 sequence (List S2) using the Integrated DNA Technologies RealTime PCR tool.

**List S2.** Aligned partial Johnny Darter vitellogenin 3 sequence

Aligned sequence: 1048 bp

ATGAGGGAGTGGTCAATCTTTGGACTCGGCATGCTAAACCTCGCTGAGTCTGGTGCAACAATCAC  
GTGCAAGATCAAGATCAGTGGGTTGTCGACACAAACATTCATCCTTCAGGTTTCAGATTTTGCCTT  
CAAGGAGTTCAATGGCTTCCAGGGGAAAGACAGCTTTATTGCCTCCCCAAAGCTCACCCAGCGT  
ATTGCTTCCCAGCTTGTCAAACCTTTCATGTTTGACTACATTGGTGGACACGTTGGTAACATCCGA  
GCTTCTGCTGAGATTTCTGACACTATTGTCAACATTGTGAGAGGGATTCTGGGATTGTTCCAAGTC  
ACTGTGAAGACCACACAGAAGATCTATGAGCTTGAAGAGGCCGGCATCCATGGCATTGTGCCAA  
GTA ACTATGCTACTGAAGTAAACATGGAACAAAGGACATGACCATCACTCAGGTTGTAGATGT  
CAGTAACTGCAGGGAGAAAGTAGCCATGTACAAGGGAATGGCTACCGCTGTGTTTGACCAAGTC  
TCCAAACAGAGAGGTGAATCTGTCAATTTCACAGTGAGATATATTTACACAGTCAAGCCAACAG  
CAGAGGGAGGTCTCATTACGAAGGCTCATGGCCTGGAGCAACAGCACTTCAGTCCCTTCAACGT

GAAGGGCGGCAGTTTCCAGATGCTAGCGATGAAGGAAATGGTGCTGCTCGGAGTGAGTGACACA  
CAGAGAGCAGTCGTGTCTGGGCCAATGGAAAGCAAAGGCAACCTTGTTTACCATTTTGTCAATGC  
AGATGCTAATGTACCGATTGTGATGCAGAGAATGGACAACCCAGTACCAAAGGCTATTGAGTTG  
TTCAAGCATCTGGCAGAGGTTAATCGTTACAAGATTGACAGTGCAACAACAGAGGACACGATAA  
AGCTGTATCAACTCCTGCGAGCATTTCCTATGAAGAACTAGAAGTTATGTGGAAGCAATTTGCA  
GCAAATGATGAGCAAAGACGTTGGTTTTAGACATGATTGTTGAGGTAAACGATGCCAGAATCCT  
GAAGTTCTTCAAAA

#### *Johnny Darters' male liver Vtg qPCR*

Male liver total RNA samples were diluted to 10 ng/μl for use in real-time quantitative PCR reactions. A Johnny Darter specific qPCR amplicon from the PCR reaction with Fp1116\_otd\_vtg\_15-9\_fw1 and Fp1117\_otd\_vtg\_15-9\_rv1 (Table S1) was used as a vtg3 standard. The amplicon was diluted 10<sup>6</sup>-fold for use as a standard in the qPCR analyses (seven additional dilutions in a 10-fold series). For qPCR, each 20 μl reaction contained 20 ng total RNA template, 2 μl of appropriate dilutions of vtg3 cDNA standard, or 2 μl RNase-free water (no template control) combined with 215 nM of gene-specific forward and reverse primers (Table S2) and Power SYBR Green RNA-to-CT 1-step master mix (Applied Biosystems 4389986). Samples were incubated at 48°C for 30 min and 95°C for 10 min. 40 cycles of qPCR amplification were then performed at 95°C for 15 sec, 60°C for 60 sec, and 95°C for 15 sec. After amplification, a melting curve was generated to evaluate specificity. All 77 samples were analyzed on a single 96 well plate, and the analyses were performed in duplicate (two separate plates). Amplification efficiencies in the two analyses were 110 and 132%. Data from each analysis were normalized to the mean across all samples tested on each plate and then averaged to generate the final relative number of copies.

**Table S2.** Johnny Darter specific qPCR primers designed based on partial Vtg3 sequence (List S3).

| Primer ID                 | Start position | Tm (°C) | Amplicon Length | Sequence 5'→3'       |
|---------------------------|----------------|---------|-----------------|----------------------|
| fp1184_FHM_darterqPCR2_FW | 138            | 59.96   | 73              | GTTCAATGGCTTCCAGGGGA |
| fp1185_FHM_darterqPCR2_RV | 210            | 60.04   | 73              | AAGCTGGGAAGCAATACGCT |

#### **List S3.** The initial partial Johnny Darter vitellogenin 3 sequence received from Sanger Sequencing

EPA2252\_D01\_009.seq: 809 bp (produced from otd\_Vtg\_15-9)

CCTGCTCCGATAAAACCTATGAGTACAAATATGAGGGAGTGGTCAATCTTTGGACTCGGCATGCT  
AAACCTCGCTGAGTCTGGTGCAACAATCACGTGCAAGATCAAGATCAGTGGGTTGTCGACACAA  
ACATTCATCCTTCAGGTTTCAGATTTTGCCTTCAAGGAGTTCAATGGCTTCCAGGGGAAAGACAG  
CTTTATTGCCTCCCCAAAGCTCACCCAGCGTATTGCTTCCCAGCTTGTCAAACCTTTCATGTTTGAC  
TACATTGGTGGACACGTTGGTAACATCCGAGCTTCTGCTGAGATTTCTGACACTATTGTCAACATT  
GTGAGAGGGATTCTGGGATTGTTCCAAGTCACTGTGAAGACCACACAGAAGATCTATGAGCTTG  
AAGAGGCCGGCATCCATGGCATTGTGTTCCAAGTAAGTATGCTACTGAAGTAAACATGGAAACAAA  
GGACATGACCATCACTCAGGTTGTAGATGTCAGTAACTGCAGGGAGAAAGTAGCCATGTACAAG  
GGAATGGCTACCGCTGTGTTTGACCAAGTCTCCAAACAGAGAGGTGAATCTGTCAATTCAACAGT  
GAGATATATTTACACAGTCAAGCCAACAGCAGAGGGAGGTCTCATTACGAAGGCTCATGGCCTG



GAGCAACAGCACTTCAGTCCCTTCAACGTGAAGGGCGGCAGTTTCCAGATGCTAGCGATGAAGG  
AAATGGTGTCTGCTCGGAGTGAGTGACACACAGAGAGCAGTCGTGTCTGGGCCAATGGAAAGCA  
AAGGCAACCTTGTTTACCATTTTTGTCAATGCAG

EPA2253\_E01\_007.seq: 476 pb (produced from otd\_Vtg\_9-3)

GGCGGCAGTTTCCAGATGCTAGCGATGAGGAATGGTGCTGCTCGGAGTGAGTGACACACAGAGA  
GCAGTCGTGTCTGGGCCAATGGAAAGCAAGGCGACCTTGTTTACCATTTTTGTCAATGCAGATGCT  
AATGTACCGATTGTGATGCAGAGAATGGACAACCCAGTACCAAAGGCTATTGAGTTGATCAAGC  
ATCTGGCAGAGGTTAATCGTTACAAGATTGACAGTGCAACAACAGAGGACACGATAAAACTGTA  
TCAACTCCTGCGAGCAATTCCTATGAAGAACTAGAAGTTATGTGGAAGCAAATTTGCAGCAAA  
TGATGAGCAAAGACGTTTGGTTTTTAGACATGATTGTTGAGGTAAACGATGCCCAGAATCCTGAA  
GTTCTTTCAAATGAGGTTCCAGGCTGGTGATGTGACTGCTAATGAAGCTCTGCAAGCCCCATTTTT  
GCTGGTGATGAACCATCTCCAGCC

EPA2253\_C12\_092.seq: 440 bp (produced from otd\_Vtg\_9-3)

CCTTCACGTGAAGGGCGGCAGTTTCCAGATGCTAGCGATGAAGGAAATGGTGCTGCTCGGAGTG  
AGTGACACACAGAGAGCAGTCGTGTCTGGGCCAATGGAAAGCAAAGGCAACCTTGTTTACCATT  
TTGTCAATGCAGATGCTAATGTACCGATTGTGATGCAGAGAATGGACAACCCAGTACCAAAGGC  
TATTGAGTTGTTCAAGCATCTGGCAGAGGTTAATCGTTACAAGATTGACAGTGCAACAACAGAG  
GACACGATAAAGCTGTATCAACTCCTGCGAGCATTTCCTATGAAGAACTAGAAGTTATGTGGA  
AGCAATTTGCAGCAAATGATGAGCAAAGACGTTGGTTTTTAGACATGATTGTTGAGGTAAACGAT  
GCCAGAATCCTGAAGTTCTTCAAATGAGGTTCCAGGCTGGTGATGTGACTGCTA

EPA2254\_F01\_005.seq: 31 bp (produced from otd\_Vtg\_7-10)

TTGTCCTGTAGCTGTTGTTTCAGCCACTACTG

EPA2254\_D12\_090.seq: 159 bp (produced from otd\_Vtg\_7-10)

TCCTGTAGCTGTTGTTTCAGCCACTACTGGACATGGCTGTGGAAAGTCAGAGGAATGGCTCCACGG  
CAGACATGGTCATCGCACTGAAAGCTCTGGGAAATGCAGGTCATCCAGGCAGCATTAATAACCAT  
CATGCGCTTCCTCCCCGGAGTTGCTGCCAG

EPA2255\_G01\_003.seq: 117 bp (produced from otd\_Vtg\_10-1)

GAGTTCTGCCTAATGATAAGCCTGTCCTCTCTGCCTATACACGGGCCCTTTGGACAAGAGTGTTCT  
TTGCTGATATTACCAAAGACACCATTTCGGAACATATTCAGGGCTTTCAGTC

EPA2255\_E12\_088.seq: 0 bp (produced from otd\_Vtg\_10-1)

NNNNN

EPA2256\_H01\_001.seq: 0 bp (produced from otd\_Vtg\_1-17)

NNNNN

EPA2256\_F12\_086.seq: 0 bp (produced from otd\_Vtg\_1-17)

NNNNN

EPA2257\_A02\_016.seq: 1 bp (produced from otd\_Vtg\_1-17)

C

EPA2257\_G12\_084.seq: 1 bp (produced from otd\_Vtg\_1-17)

NNNNN

#### *In vitro estrogenic activity*

Total estrogenic activity of water samples collected in association with Johnny Darter field collections was evaluated using the T47-KBluc in vitro bioassay [67]. Water samples (500 mL from each site per collection date) were filtered (0.7  $\mu$ m) and extracted by solid phase extraction using 200 mg sorbent Oasis Hydrophilic-Lipophilic-Balanced (HLB) glass cartridges (Waters, Milford, MA) and concentrated to 1000X in dimethyl sulfoxide (DMSO). Extracted samples at 2X and 0.5X concentrations relative to the original water sample were evaluated compared to a 17 $\beta$ -estradiol (E2) standard curve ranging from 108 to 0.106 ng E2/L (2-fold dilutions series; triplicate wells). Samples were evaluated in

triplicate within a 96-well plate, with DMSO concentrations  $\leq 0.4$  % per well. All plates included triplicate media controls and solvent controls (0.4% DMSO), which were used to calculate the significant response threshold within each assay (mean + three standard deviations of the control responses). Sample responses were analyzed by non-linear regression (log-agonist vs. response) against the E2 standard curve using GraphPad Prism (v7.04) to express total estrogenic activity of the sample in terms of 17 $\beta$ -estradiol equivalents (E2-EQ). Results are reported in Table S3.

**Table S3.** 17 $\beta$ -estradiol equivalents (E2-EQs, ng/L) displayed as mean ( $\pm$ SD) at each site during each sampling event. Mean  $\pm$  SD derived using n= 3–6 technical replicates per sample. The U–SV\* water sample on week 12/13 was taken independently of fish sampling because the site was not established for fish collection until week 14. N/A = Not applicable (did not sample).

| Site  | (Weeks 12 and 13)<br>March 2021 | (Week 16)<br>April 2021 | (Week 32)<br>August 2021 | (Week 41)<br>October 2021 |
|-------|---------------------------------|-------------------------|--------------------------|---------------------------|
| FU-BT | 2.96 (0.62)                     | 3.50 (0.50)             | N/A                      | 0.93 (0.09)               |
| U-BT  | 3.13 (0.21)                     | 2.97 (0.39)             | N/A                      | 3.67 (0.28)               |
| D-BT  | 6.07 (0.95)                     | 4.27 (0.36)             | N/A                      | 6.75 (1.35)               |
| FD-BT | 3.31 (0.49)                     | 3.43 (0.92)             | N/A                      | 4.06 (1.12)               |
| CP    | 5.52 (2.16)                     | 8.51 (2.86)             | 1.13 (0.12)              | N/A                       |
| FU-SV | 1.32 (0.77)                     | 0.92 (0.11)             | 1.25 (0.18)              | N/A                       |
| U-SV  | N/A                             | 1.51 (0.37)             | 1.42 (0.22)              | N/A                       |
| U-SV* | 6.23 (1.31)                     | N/A                     | N/A                      | N/A                       |
| D-SV  | 49.31 (22.93)                   | 32.03 (16.37)           | 6.83 (0.88)              | N/A                       |
| FD-SV | 10.18 (3.27)                    | 31.48 (15.70)           | 2.10 (0.36)              | N/A                       |

## Fish Collection Summary Tables and Male Gonad Staging and Results Figure

Summary Tables of *E. nigrum* Sampled from the Big Thompson River, St. Vrain Creek, and Cache la Poudre River in 2020 and 2021.

**Table S4.** The number of individuals of Johnny Darter *Etheostoma nigrum* sampled in 2020 and 2021.

|             | 2020               |                 |              | 2021               |                 |              |
|-------------|--------------------|-----------------|--------------|--------------------|-----------------|--------------|
| River       | Big Thompson River | St. Vrain Creek | Poudre River | Big Thompson River | St. Vrain Creek | Poudre River |
| Females     | 85                 | 74              | 15           | 265                | 243             | 64           |
| Males       | 72                 | 31              | 6            | 183                | 144             | 31           |
| Unknown Sex | 6                  | 12              | 10           | 15                 | 23              | 25           |
| Total       | 163                | 117             | 31           | 463                | 410             | 120          |

**Table S5.** Johnny Darter *Etheostoma nigrum* sampling summary for 2020 and 2021 at sites on the Big Thompson River (BT). Upstream and Downstream are in reference to the sampling site's location to the WWTP effluent input into the river.

|               | 2020     |        |            |    |             | 2021     |        |            |             |     |
|---------------|----------|--------|------------|----|-------------|----------|--------|------------|-------------|-----|
| Sampling Site | Upstream |        | Downstream |    |             | Upstream |        | Downstream |             |     |
|               | WB       | BB (U) | LWE (D)    | C9 | BTPSWA (FD) | FP (FU)  | BB (U) | LWE (D)    | BTPSWA (FD) |     |
|               |          |        |            |    |             |          |        |            |             |     |
| Females       | 4        | 30     | 18         | 3  | 30          | 75       | 47     | 81         |             | 62  |
| Males         | 7        | 23     | 22         | 1  | 19          | 36       | 30     | 60         |             | 57  |
| Unknown Sex   | 1        | 3      | 0          | 0  | 2           | 2        | 0      | 6          |             | 5   |
| Total         | 12       | 56     | 40         | 4  | 51          | 113      | 77     | 147        |             | 124 |

**Table S6.** Johnny Darter *Etheostoma nigrum* sampling summary for 2020 and 2021 at sites on St. Vrain Creek (SV). Upstream and Downstream are in reference to the sampling site's location to the WWTP effluent input into the river.

| Sampling Site | 2020     |            |     |     |      | 2021     |     |       |            |      |
|---------------|----------|------------|-----|-----|------|----------|-----|-------|------------|------|
|               | Upstream | Downstream |     |     |      | Upstream |     |       | Downstream |      |
|               | GPP      |            | GW  |     | SNA  | GPP      | IW  |       | GW         | SNA  |
|               | (FU)     | LWE        | (D) | ECL | (FD) | (FU)     | (U) | USLWE | (D)        | (FD) |
| Females       | 21       | 0          | 9   | 29  | 12   | 75       | 53  | 3     | 60         | 55   |
| Males         | 10       | 1          | 6   | 4   | 10   | 44       | 31  | 1     | 36         | 33   |
| Unknown       |          |            |     |     |      |          |     |       |            |      |
| Sex           | 6        | 0          | 0   | 1   | 5    | 3        | 2   | 0     | 2          | 16   |
| Total         | 37       | 1          | 15  | 34  | 30   | 122      | 86  | 4     | 98         | 104  |

**Table S7.** Johnny Darter *Etheostoma nigrum* sampling summary for 2020 and 2021 at sites on the Cache la Poudre River (CP).

| <b>Sampling Site</b> | <b>2020</b> |                | <b>2021</b>    |
|----------------------|-------------|----------------|----------------|
|                      | <b>TB</b>   | <b>C5 (CP)</b> | <b>C5 (CP)</b> |
| Females              | 4           | 30             | 64             |
| Males                | 7           | 23             | 31             |
| Unknown Sex          | 1           | 3              | 25             |
| Total                | 12          | 56             | 120            |

## Male Gonad histology

**Table S8.** Description of gonad developmental staging according to OECD used to stage male Johnny Darter *Etheostoma nigrum* collected in our study. Table adapted from Johnson et al. 2009 [47].

| Stage           |                                                                                                                                                                                          |
|-----------------|------------------------------------------------------------------------------------------------------------------------------------------------------------------------------------------|
| <b>Juvenile</b> | Gonad consists of spermatogonia exclusively; it may be difficult or impossible to confirm the sex of these individuals                                                                   |
| <b>0</b>        | <i>Undeveloped:</i> entirely immature phases (spermatogonia to spermatids) with no spermatozoa                                                                                           |
| <b>1</b>        | <i>Early spermatogenic:</i> immature phases predominate, but spermatozoa may also be observed; the germinal epithelium is thicker thinner than it is during Stage 2                      |
| <b>2</b>        | <i>Mid-spermatogenic:</i> spermatocytes, spermatids, and spermatozoa are present in roughly equal proportions; the germinal epithelium is thinner than Stage 1, but thicker than Stage 3 |
| <b>3</b>        | <i>Late spermatogenic:</i> all stages may be observed, however, mature sperm predominate; the germinal epithelium is thinner than it is during Stage 2                                   |
| <b>4</b>        | <i>Spent:</i> loose connective tissue with some remnant sperm                                                                                                                            |

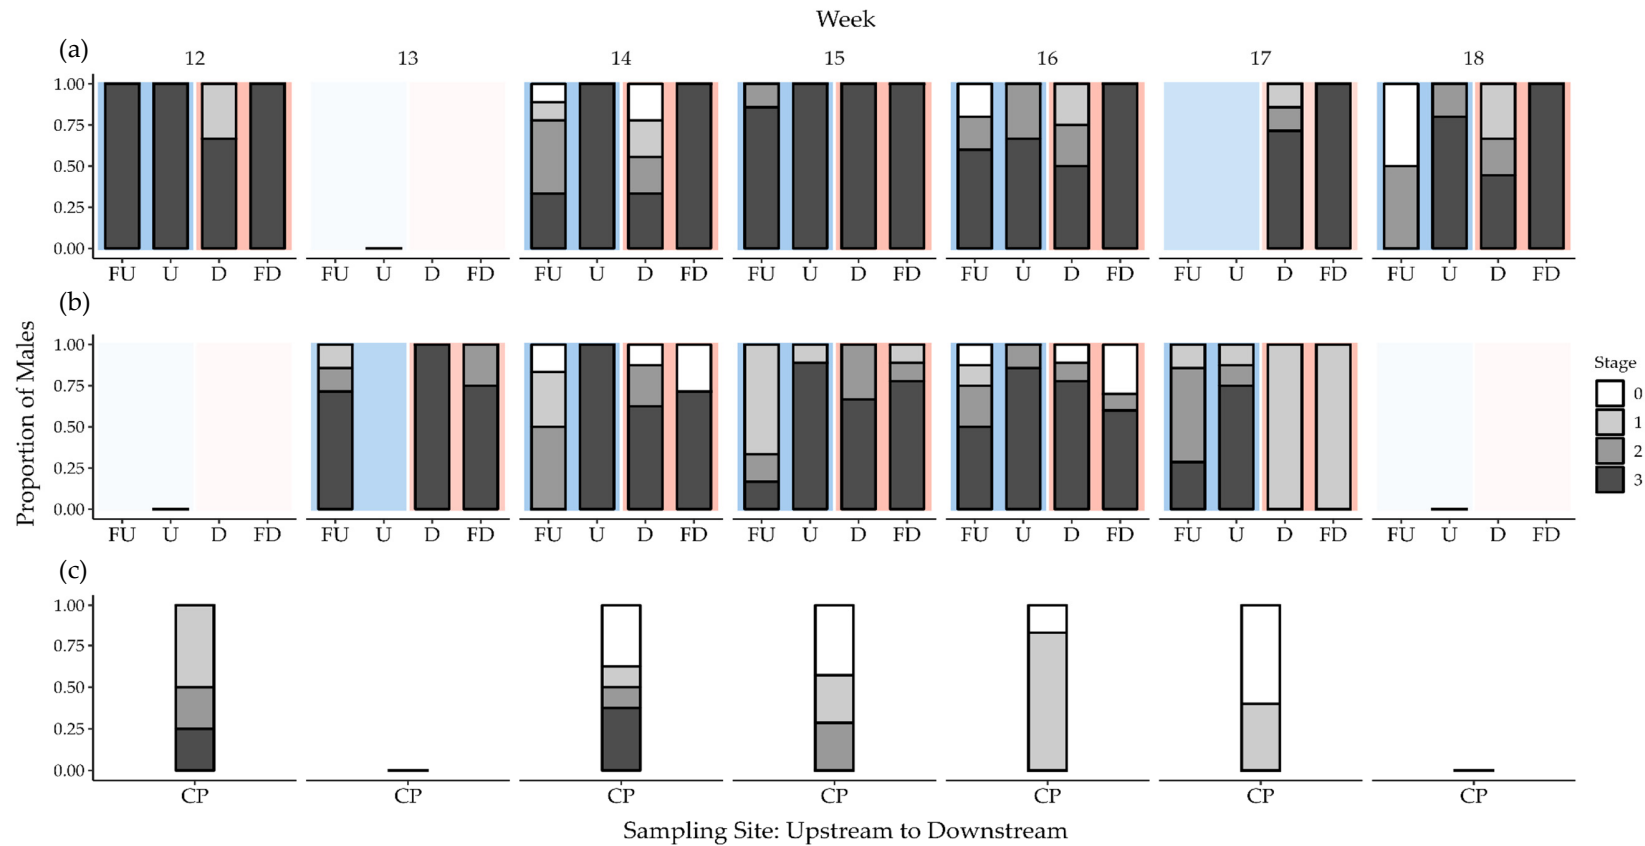

**Figure S1.** Proportions of males in each reproductive stage sampled each week during the spawning season in 2021 at the (a) the BT and (b) SV far upstream (FU), upstream (U), downstream (D), and far downstream (FD) sites, and the (c) CP site. Stages were assigned using OECD guidelines [47]. Red highlighted columns indicate sites subject to warmer overwinter water temperatures (downstream of the WWTP) and blue highlighted columns indicate sites subject to cooler overwinter water temperatures (upstream of the WWTP) on the SV and BT. The SV was not sampled during week 12, BT and CP were not sampled during week 13, and only BT was sampled during week 18 due to high flows elsewhere. The U-SV site was not established until week 14. No males were sampled at FU or U-BT

### Detailed Pesticide and Personal Care Products (PPCPs) and Nutrients (NNPs) results

Ninety-six of 193 PPCPs and 3 of 3 NNPs (nitrate, nitrite, and orthophosphate) were detected at least once (Table S9; Figure S2). In the pre-spawn and spawn samples, 89 unique chemicals were detected, though the pre-spawn samples contained 10 unique PPCPs the spawn samples did not and the spawn samples also contained 10 unique PPCPs the pre-spawn did not. The post-spawn samples detected only 64 PPCPs/NNPs, and no PPCPs detected were unique to the post-spawn samples.

**Table S9.** Average concentrations of NNPs and PPCPs at Cache la Poudre (CP), Big Thompson (BT), and St. Vrain (SV) sampling sites during the pre-spawn and spawn sample collections in March and April of 2021. NNPs are in µg/L and PPCPs are in ng/L.

| Sampling Site |                                       | Far Upstream |       |      | Upstream |       | Downstream |        | Far Downstream |       |
|---------------|---------------------------------------|--------------|-------|------|----------|-------|------------|--------|----------------|-------|
|               |                                       | CP           | SV    | BT   | SV       | BT    | SV         | BT     | SV             | BT    |
| River Analyte |                                       |              |       |      |          |       |            |        |                |       |
| NNPs          | Nitrate as N                          | 1017.5       |       |      | 1017.45  | 258.5 | 2100       | 5430   | 1509           | 2810  |
|               | Nitrite as N                          | 21.35        |       | 419  | 22.6     | 6.7   | 13.8       | 465.05 | 14.45          | 152.3 |
|               | Orthophosphate as P                   | 28.55        | 16.55 | 26.6 | 24.95    | 15.95 | 923.5      | 1252.8 | 479.45         | 455.3 |
|               | (+/-)11-nor-9-carboxy-delta-THC       |              |       |      |          |       |            | 69.4   |                |       |
| PPCPs         | 10,11-dihydro-10-hydroxycarbamazepine | 391          | 11    |      |          |       | 920        | 2060   | 676            | 614   |
|               | 2,4,5-TP                              |              |       |      |          | 13    |            | 21.8   |                | 16.8  |
|               | 2,4-D                                 |              |       | 301  | 14.8     | 247   | 18.2       | 247    | 39.6           | 288   |
|               | 3-Hydroxycarbofuran                   |              |       |      |          |       | 19         | 62.3   | 79.4           | 24    |
|               | 6-Acetylmorphine                      |              |       |      |          |       |            | 17.4   |                |       |
|               | Acebutolol                            |              |       |      |          |       |            | 55.7   |                | 13.8  |
|               | Acetaminophen                         |              |       |      |          | 15.3  |            | 13.9   | 21.3           | 11.1  |
|               | Amitriptyline                         |              |       |      |          |       |            | 22     |                |       |
|               | Amitriptyline (+/-)-E-10-hydroxylated |              |       |      |          |       |            | 13.95  |                |       |
|               | Atenolol                              | 62.6         |       |      |          |       | 29         | 460.5  | 29.7           | 144.5 |
|               | Atrazine                              |              |       |      |          | 12.9  |            |        | 14.9           |       |
|               | Bentazon                              |              |       |      |          |       |            |        |                | 25.25 |
|               | Benzoylcegonine                       | 12.1         |       |      |          |       |            | 42.7   |                | 16.6  |
|               | Bromacil                              |              |       |      |          |       |            | 61.3   |                |       |
|               | Bupropion                             | 39.5         |       |      |          |       | 126.5      | 429    | 83.6           | 87.95 |
|               | Caffeine                              | 149          | 64.3  | 103  | 242.35   | 333.2 | 102.15     | 51.8   | 791            | 97.3  |
|               | Carbamazepine                         | 48.8         |       |      |          |       | 105.8      | 191.5  | 100            | 57.45 |
|               | Carbamazepine 10,11 epoxide           | 19.2         |       |      |          |       | 70.35      | 156    | 50.4           | 44.1  |
|               | Carisoprodol                          |              |       |      |          |       | 17.1       |        |                |       |

|                                |      |     |      |      |      |        |       |      |       |
|--------------------------------|------|-----|------|------|------|--------|-------|------|-------|
| Celecoxib                      |      |     |      |      |      |        | 102   |      | 29.1  |
| Codeine                        | 16.7 |     |      |      |      | 15.45  | 90.3  | 16.4 | 29.45 |
| Cotinine                       |      |     | 10.4 |      | 16.7 | 10.5   | 13.6  | 10.2 | 13.55 |
| DEET                           | 20.7 | 137 | 33.8 | 46.5 | 28.7 | 30.45  | 16.4  | 42.4 | 22.9  |
| Desmethylcitalopram            | 16.7 |     |      |      |      | 40.1   | 137   | 24.6 | 37.4  |
| Desmethylvenlafaxine           | 376  |     |      |      |      | 844.5  | 2695  | 690  | 801.5 |
| Dextromethorphan               |      |     |      |      |      | 14.85  | 47.75 |      | 14.2  |
| Dextropropion                  | 96.2 |     |      |      |      | 184    | 555   | 136  | 164.5 |
| Diclofenac                     |      |     |      |      |      | 100.95 | 411   | 118  | 136.5 |
| Diclofenac 4-hydroxy           |      |     |      |      |      |        | 85.05 |      |       |
| Diltiazem                      |      |     |      |      |      |        | 19    |      |       |
| Diphenhydramine                | 10.5 |     |      |      |      | 17.75  | 292   |      | 81.95 |
| Diuron                         |      |     |      |      |      | 25.8   | 65.75 |      | 27.15 |
| EDDP                           | 11.1 |     |      |      |      | 55.9   | 98.8  | 36.2 | 31.15 |
| Escitalopram                   | 22.1 |     |      |      |      | 68.65  | 269.5 | 30.2 | 70.65 |
| Famotidine                     | 104  |     |      |      |      | 114.5  | 564   | 91.2 | 232   |
| Fluconazole                    | 38   |     |      |      |      | 81.15  | 294.5 | 44.9 | 86.65 |
| Furosemide                     | 32.4 |     |      |      |      | 225    | 1260  | 156  | 162.5 |
| Gabapentin                     | 723  |     | 13.2 | 27.3 | 20.6 | 56.1   | 210   | 77.1 | 305   |
| Gemfibrozil                    | 69.8 |     |      |      |      | 22.5   | 574.5 |      | 268.5 |
| Hydrochlorothiazide            | 163  |     |      |      |      | 636.5  | 2125  | 504  | 545.5 |
| Hydrocodone                    |      |     |      |      |      |        | 23.55 |      |       |
| Hydromorphone                  |      |     |      |      |      |        | 30.35 |      | 13.8  |
| Hydroxybupropion               | 244  |     |      |      |      | 436.5  | 862   | 315  | 433   |
| Ibuprofen                      |      |     |      |      |      |        | 18    |      | 22.1  |
| Imidacloprid                   | 38.4 |     |      |      |      |        | 38.5  |      |       |
| Lamotrigine                    | 658  |     | 11.7 |      | 10.5 | 1402.5 | 5125  | 1240 | 2310  |
| Lidocaine                      | 152  |     |      |      |      | 408.5  | 1205  | 318  | 420   |
| Lorazepam                      |      |     |      |      |      |        | 17.4  |      |       |
| MCPD                           |      |     | 58   |      | 42.4 |        | 47.8  |      | 44.4  |
| MDMA                           |      |     |      |      |      |        | 11.2  |      |       |
| Meprobamate                    | 27.8 |     |      |      |      | 28.65  | 82.25 | 47   | 31.35 |
| Metaxalone                     |      |     |      |      |      | 10.3   | 18.95 |      |       |
| Metformin                      | 553  |     | 38.6 |      | 20.5 | 214.5  | 335   | 192  | 328.5 |
| Methadone                      |      |     |      |      |      | 10.7   | 14.7  |      |       |
| Methamphetamine                | 16.5 |     |      |      |      | 19.7   | 18.8  |      | 19.3  |
| Methylphenidate                |      |     |      |      |      |        | 10.8  |      |       |
| Metolachlor ESA                | 252  |     |      | 21.1 |      | 66.9   | 236   | 44.5 | 102   |
| Metoprolol                     | 85.6 |     |      |      |      | 172.5  | 683   | 130  | 199.5 |
| Modafinil                      | 12.2 |     |      |      |      | 22.65  | 54.15 | 18   | 18.95 |
| Modafinil acid                 | 56.1 |     |      |      |      | 110    | 223   |      |       |
| _____ Monoethylglycinexylidide |      |     |      |      |      | 15     | 58.15 | 14   | 25.75 |



|                                   |      |      |        |       |      |        |
|-----------------------------------|------|------|--------|-------|------|--------|
| Morphine                          | 18.6 |      | 53.25  | 395.5 | 31.9 | 83.7   |
| Naproxen                          | 79.4 | 37.1 |        | 75.9  | 108  | 75.3   |
| Norfentanyl                       |      |      |        | 11.85 |      |        |
| Norquetiapine                     |      |      | 18.65  | 58.3  | 13.4 | 19.75  |
| Omeprazole                        |      |      |        | 13.3  |      |        |
| Oxazepam                          |      |      | 13     | 29.2  |      | 11     |
| Oxcarbazepine                     | 17.3 |      | 318    | 407   | 108  | 73.85  |
| Oxycodone                         |      |      | 12.3   | 73.5  |      | 16.6   |
| Oxymorphone                       |      |      | 20.45  | 78.25 | 11.9 | 17.3   |
| Phenobarbital                     | 13.8 |      | 34.35  | 69.95 | 28.8 | 22.4   |
| Phentermine                       | 26.4 |      |        | 143.5 |      | 45     |
| Phenytoin                         |      |      | 27     | 51.15 |      |        |
| Pravastatin                       |      |      |        | 83.35 |      | 50.7   |
| Pregabalin                        | 60.8 |      | 10.5   | 215.1 | 14.1 | 147.55 |
| Primidone                         |      |      | 49.25  | 205.5 | 70.3 | 85.35  |
| Propranolol                       | 17.5 |      | 27.6   | 120.5 | 15.8 | 31.75  |
| Quetiapine                        |      |      |        | 15.7  |      |        |
| Ritalinic acid                    | 39   |      |        | 140   |      | 36.15  |
| Sotalol                           | 41.7 |      | 105.35 | 244   | 86   | 106    |
| Sulfamethoxazole                  | 109  |      | 59.35  | 225   | 62.7 | 135    |
| Sumatriptan                       | 10.5 |      | 17.8   | 88.45 | 14.1 | 21.65  |
| Tebuconazole                      |      |      |        | 58.6  |      |        |
| Temazepam                         |      |      | 18.3   | 49.25 |      | 12.9   |
| Thiabendazole                     |      | 18.9 | 20.6   | 40.9  | 13.3 | 14.15  |
| Tramadol                          | 93.2 |      | 177    | 583   | 150  | 231.5  |
| Trazodone                         |      |      |        | 44.45 |      | 11.4   |
| Triamterene                       | 18.2 |      | 34.55  | 114.5 | 19.6 | 42.15  |
| Triclopyr                         |      | 27.7 | 33.75  |       |      | 29.7   |
| Triclosan                         |      |      |        | 11.3  |      |        |
| Trimethoprim                      | 58.1 |      | 113.35 | 401.5 | 80.2 | 160.5  |
| Valsartan                         | 68   |      | 34.65  | 820   | 22.4 | 249    |
| Venlafaxine                       | 88.1 |      | 236    | 741.5 | 163  | 249    |
| Zolpidem phenyl-4-carboxylic acid | 16.7 |      | 36.55  | 110.2 | 28   | 40.2   |

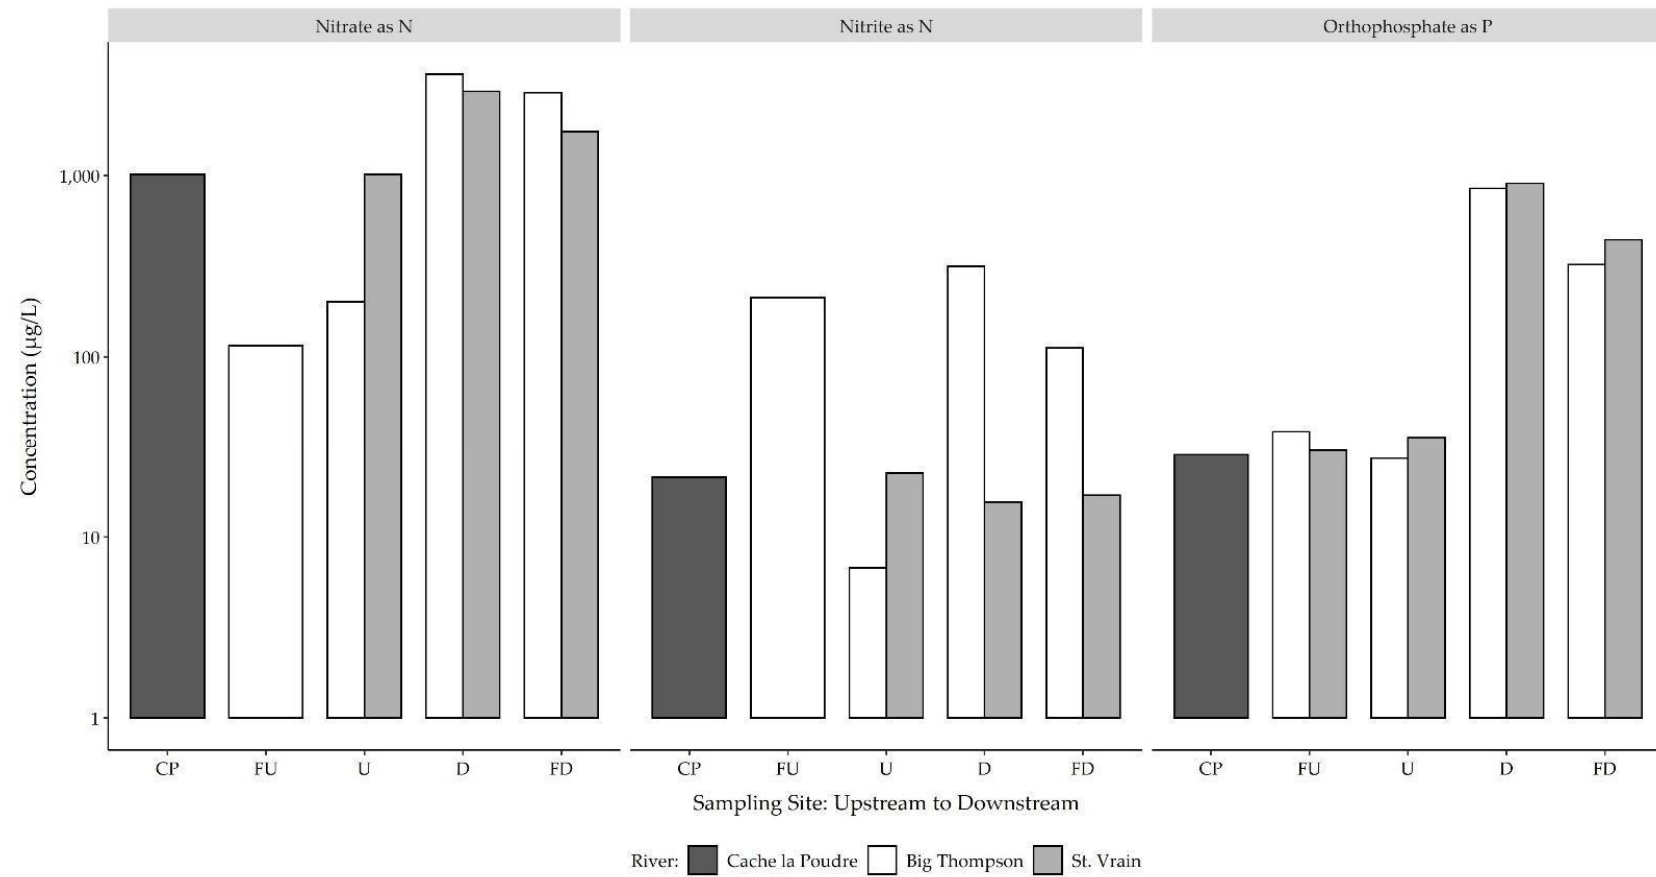

**Figure S2.** Nutrient concentrations at all study sites. If a site is missing on the figure, that nutrient was not detected at that site. The y-axis is transformed for graphical comparison.

Of the 96 PPCPs and 3 NNPs, only 3 PPCPs (caffeine, DEET, and gabapentin) and 1 NNP (orthophosphate) were detected at every site. Forty-one PPCPs were detected exclusively at all sites downstream of the WWTPs in BT and SV as well as CP, apart from 6 PPCPs not detected also in CP (3-Hydroxycarbofuran, Diclofenac, Monoethylglycinexylidide, Norquetiapine, Oxymorphone, Primidone; Table S9). There were 28 PPCPs detected in BT that were not detected in SV, 18 of which were only detected at site D–BT. Only 3 of those (Ritalinic acid, Phentermine, and Benzoylecgonine) were also in CP. The only chemical in SV that was not in the BT or CP was Carisoprodol and only detected at D–SV. There were no PPCPs detected in the CP that were not detected in BT or SV.

## References

64. National Center for Biotechnology Information (NCBI)[Internet]. Bethesda (MD): National Library of Medicine (US), National Center for Biotechnology Information [1988]. 2022. [cited 2022 Apr 29]. Available online: <https://www.ncbi.nlm.nih.gov/protein> (accessed on 29 April 2022).
65. The UniProt Consortium. UniProt: The universal protein knowledgebase in 2021. *Nucleic Acids Research*, 2020, 49: D480–D489. <https://doi.org/10.1093/nar/gkaa1100>.
66. National Center for Biotechnology Information (NCBI). Gene [Internet]. Bethesda (MD): National Library of Medicine (US), National Center for Biotechnology Information [1988]. 2021. Gene ID: 116695776, Vtg3 vitellogenin 3, phosvitinless [*Etheostoma spectabile* (Orangethroat Darter)]. [cited 2022 Apr 29]. Available online: <https://www.ncbi.nlm.nih.gov/gene/116695776> (accessed on 29 April 2022).
67. Wilson, V.S.; Bobseine, K.; Gray, L.E. Development and characterization of a cell line that stably expresses an estrogen-responsive luciferase reporter for the detection of estrogen receptor agonist and antagonists. *Toxicol. Sci.* **2004**, 81, 69–71.
68. Wagner, M.; Vermeirssen, E.L.M.; Buchinger, S.; Behr, M.; Magdeburg, A.; Oehlmann, J. Deriving bio-equivalents from in vitro bioassays: Assessment of existing uncertainties and strategies to improve accuracy and reporting. *Environ. Toxicol. Chem.* **2013**, 32, 1906–1917.
